# Supplementary material for: Retarding crystal transitions of polybutene-1 in blends
Source: Royal Society of Chemistry journal article supplement (doi:10.1039/d3ce00584d), 2023-01-01
Supplement: d3ce00584d1.pdf [file d3ce00584d1.pdf]

## SUPPORTING INFORMATION

### Retarding crystal transitions of polybutene-1 in blends

Zefeng Cui,<sup>a</sup> Chuang Li,<sup>a</sup> Binyuan Liu,<sup>\*a</sup> and Shichun Jiang<sup>\*b</sup>

---

<sup>a</sup>Hebei Key Laboratory of Functional Polymer, School of Chemical Engineering and Technology, Hebei University of Technology, Tianjin 300130, China. E-mail: byliu@hebut.edu.cn

<sup>b</sup>School of Materials Science and Engineering, Tianjin University, Tianjin 300072, China. E-mail: scjiang@tju.edu.cn

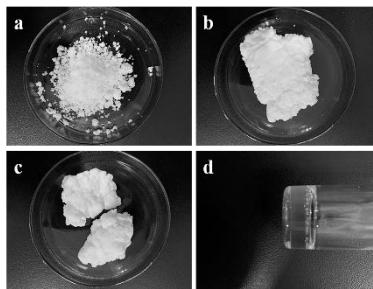

Figure S1. Photos of samples. (a) neat-PB; (b) PB-5.4 mol%; (c) PB-14.6 mol%; (d) PB-36.6 mol%.

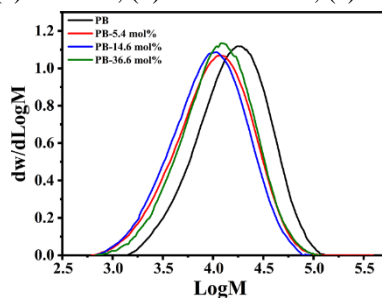

Figure S2. GPC curves of PB-TMAS copolymers.

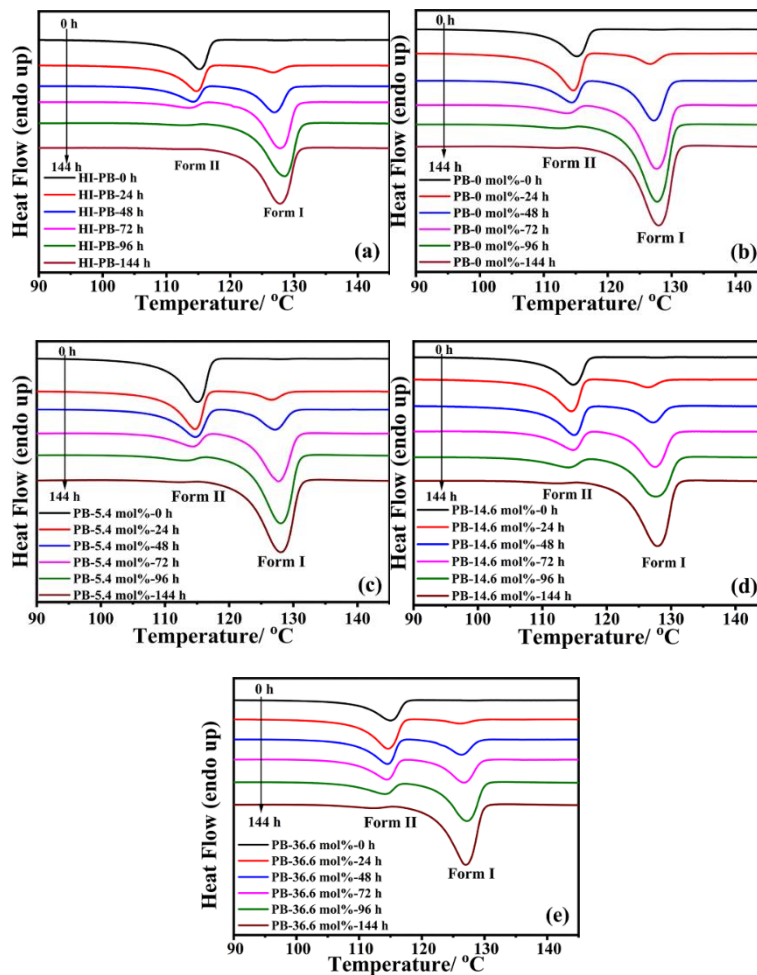

Figure S3. DSC curves of phase transition of HI-PB blending with PB-TMAS with different TMAS contents: (a) HI-PB; (b) PB-0 mol%; (c) PB-5.4 mol%; (d) PB-14.6 mol%; (e) PB-36.6 mol%.

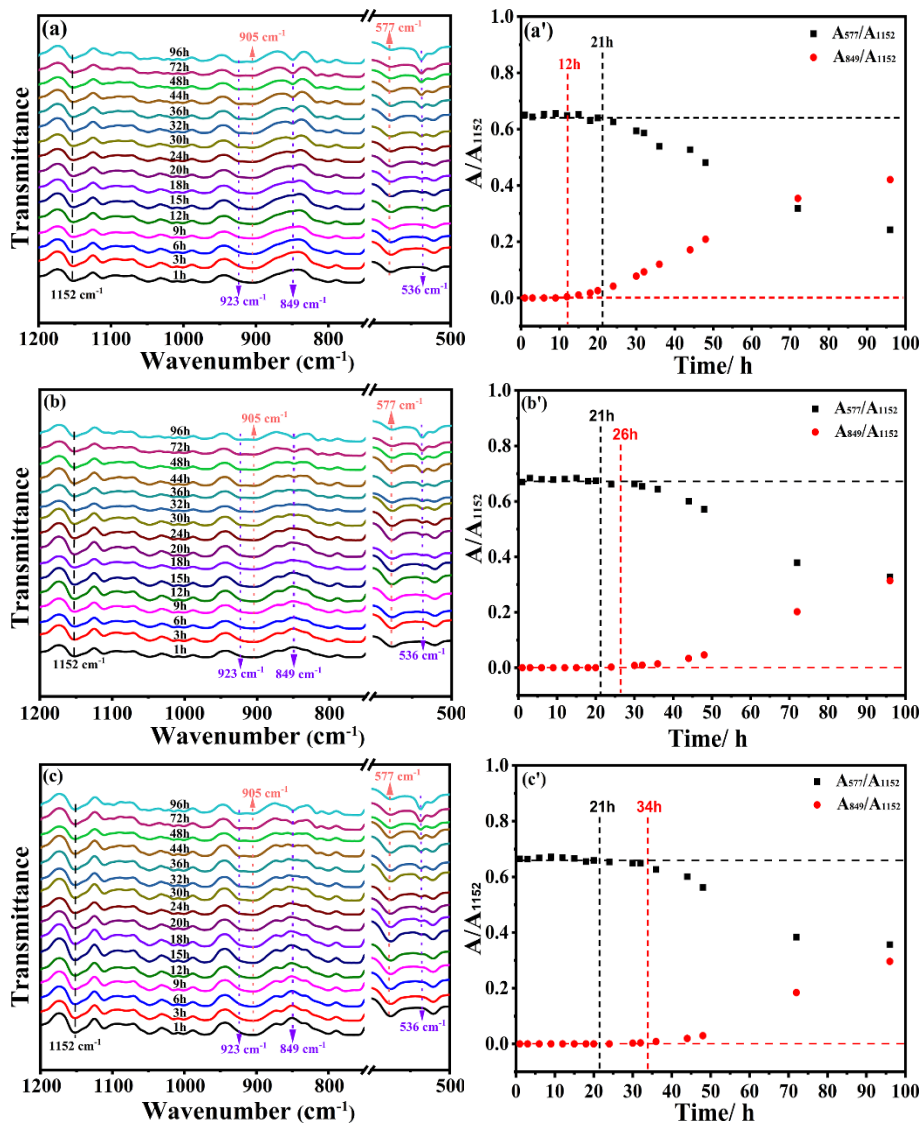

**Figure S4.** FT-IR and area ratios  $A/A_{1152}$  curves of phase transition of HI-PB blending with PB-TMAS with different TMAS contents: (a) HI-PB; (b) PB-14.6 mol%; (c) PB-36.6 mol%; (a') HI-PB; (b') PB-14.6 mol%; (c') PB-36.6 mol%.

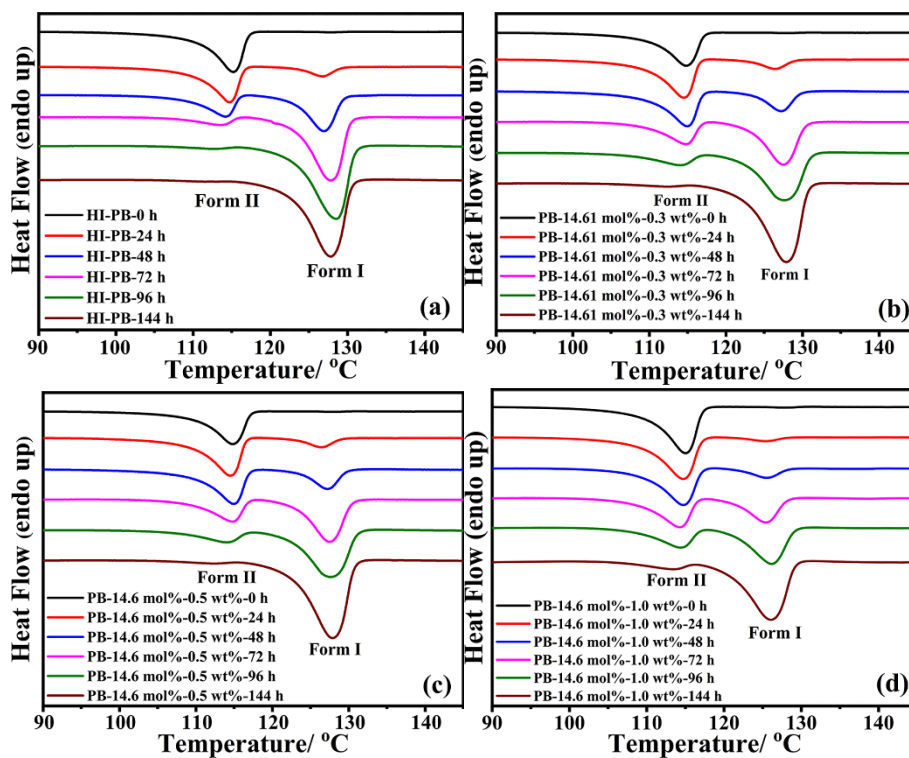

**Figure S5.** DSC curves of phase transition of HI-PB blending with different weight of PB-TMA contents: (a) HI-PB; (b) PB-14.6 mol%-0.3 wt%; (c) PB-14.6 mol%-0.5 wt%; (d) PB-14.6 mol%-1.0 wt%.
